# Supplementary material for: Adaptable sublattice stabilized high-entropy materials with superior thermoelectric performance
Source: Royal Society of Chemistry journal article supplement (doi:10.1039/d3ee02788k), 2023-01-01
Supplement: d3ee02788k1.pdf [file d3ee02788k1.pdf]

## Supporting Information

### Adaptable sublattice stabilized high-entropy materials with superior thermoelectric performance

Haotian Gao<sup>a</sup>, Kunpeng Zhao<sup>a,b\*</sup>, Hexige Wuliji<sup>a\*</sup>, Min Zhu<sup>c</sup>, Beibei Xu<sup>c</sup>, He Lin<sup>d</sup>, Liting Fei<sup>d</sup>, Hongyao Zhang<sup>d</sup>, Zhengyang Zhou<sup>e</sup>, Jingdan Lei<sup>a</sup>, Heyang Chen<sup>a</sup>, Shun Wan<sup>b</sup>, Tian-Ran Wei<sup>a,b</sup>, and Xun Shi<sup>a,e\*</sup>

#### A: Lattice thermal conductivity calculations

The lattice thermal conductivity is calculated by subtracting the carrier contribution  $\kappa_e$  and bipolar contribution  $\kappa_{\text{bipolar}}$  from the total  $\kappa$ , i.e.  $\kappa_L = \kappa - \kappa_e - \kappa_{\text{bipolar}}$ , where  $\kappa_L$  is lattice thermal conductivity,  $\kappa$  is measured total thermal conductivity,  $\kappa_e$  is electrical thermal conductivity, and  $\kappa_{\text{bipolar}}$  is bipolar thermal conductivity. The carrier thermal conductivity can be determined by the Wiedemann-Franz law:  $\kappa_e = L\sigma T$ , where  $T$  is absolute temperature,  $\sigma$  is experimental electrical conductivity and  $L$  is the Lorenz factor. The simple two-band model proposed by Simon<sup>1</sup>, i.e. one parabolic conduction band and one parabolic valence band, is used to calculate the bipolar contribution  $\kappa_{\text{bipolar}}$ . The Lorenz factor  $L$  can be estimated by Equations S1–S2<sup>1</sup>:

$$S = m \frac{k_B}{e} \left( \frac{(\lambda + 2)F_{\lambda+1}(\eta)}{(\lambda + 1)F_{\lambda}(\eta)} - \eta \right) \quad (\text{S1})$$

$$L = \left( \frac{k_B}{e} \right)^2 \left\{ \frac{(\lambda + 3)F_{\lambda+2}(\eta)}{(\lambda + 1)F_{\lambda}(\eta)} - \left[ \frac{(\lambda + 2)F_{\lambda+1}(\eta)}{(\lambda + 1)F_{\lambda}(\eta)} \right]^2 \right\} \quad (\text{S2})$$

where  $e$  is elementary charge,  $k_B$  is Boltzmann constant,  $S$  is experimental Seebeck coefficient,  $\eta$  is reduced Fermi level,  $\lambda$  is scattering parameter, and  $F_{\lambda}(\eta)$  is Fermi

integrate defined as  $F_{\lambda}(\eta) = \int_0^{\infty} \frac{x^{\lambda}}{1 + e^{x-\eta}} dx$ .

The room temperature reduced Fermi level is derived from both the carrier

concentration and Seebeck coefficient on the basis of single band approximation. Assuming that the intrinsic carrier  $n_0$  is negligible and external doping is fully excitation, external dopant  $N_D$  is equal to be experimental carrier concentration at room temperature. Therefore, the electron concentration, hole concentration and reduced Fermi level can be solved by Equations S3–S5<sup>1</sup>:

$$n = p_0 + N_D \quad (\text{S3})$$

$$n = 4\pi \left( \frac{2m_e^* k_B T}{h^2} \right)^{3/2} F_\lambda(\eta) \quad (\text{S4})$$

$$p = 4\pi \left( \frac{2m_h^* k_B T}{h^2} \right)^{3/2} F_\lambda(-\eta - E_g) \quad (\text{S5})$$

where  $m_e^*$  is electron effective mass,  $m_h^*$  is hole effective mass and  $E_g$  is band gap.

The electron Seebeck coefficient  $S_n$  and hole Seebeck coefficient  $S_p$  can be calculated by:

$$S_n = m \frac{k_B}{e} \left( \frac{(\lambda + 2)F_{\lambda+1}(\eta)}{(\lambda + 1)F_\lambda(\eta)} - \eta \right) \quad (\text{S6})$$

$$S_p = m \frac{k_B}{e} \left( \frac{(\lambda + 2)F_{\lambda+1}(-\eta - E_g)}{(\lambda + 1)F_\lambda(-\eta - E_g)} + \eta + E_g \right) \quad (\text{S7})$$

The electron conductivity  $\sigma_n$  and hole conductivity  $\sigma_p$  can be estimated by Equations S8–S10:

$$\sigma_n = n_0 \mu_{\text{aver}} e \quad (\text{S8})$$

$$\sigma_h = A p_0 \mu_{\text{aver}} e \quad (\text{S9})$$

$$\sigma_n S_n + \sigma_p S_p = \sigma S \quad (\text{S10})$$

where  $\mu_{\text{aver}}$  is average mobility, and A is a parameter to fit calculated Seebeck coefficient and measured Seebeck coefficient. Finally, bipolar thermal conductivity can be calculated by<sup>1</sup>:

$$\kappa_{\text{bipolar}} = \frac{\sigma_n \sigma_p}{\sigma_n + \sigma_p} (S_n - S_p)^2 T \quad (\text{S11})$$

## B: Calculation of the Mg content

It is assumed that each  $\text{Bi}_{\text{Sn}}$  introduces one electron and each  $V_{\text{Mg}}$  introduces two holes. Then, the content of Mg vacancies can be estimated by<sup>2</sup>:

$$x_v = \frac{1}{2} \left( x - \Delta n \frac{M}{\rho N_A} \right) \quad (\text{S12})$$

$$\Delta n = n - n_0 \quad (\text{S13})$$

where  $x_v$  is the content of  $V_{\text{Mg}}$ ,  $x$  is the nominal Bi content,  $n$  is the measured carrier concentration for our  $\text{Mg}_{2-\delta}\text{Si}_{0.12}\text{Ge}_{0.13}\text{Sn}_{0.75-x}\text{Bi}_x$  samples,  $n_0$  is the carrier concentration of  $\text{Mg}_2\text{Si}_{0.12}\text{Ge}_{0.13}\text{Sn}_{0.75}$ ,  $M$  is the relative molecular mass,  $\rho$  is the sample's density, and  $N_A$  is the Avogadro constant. Therefore, the content of Mg ( $x_{\text{Mg}}$ ) is given by

$$x_{\text{Mg}} = 2 - x_v \quad (\text{S14})$$

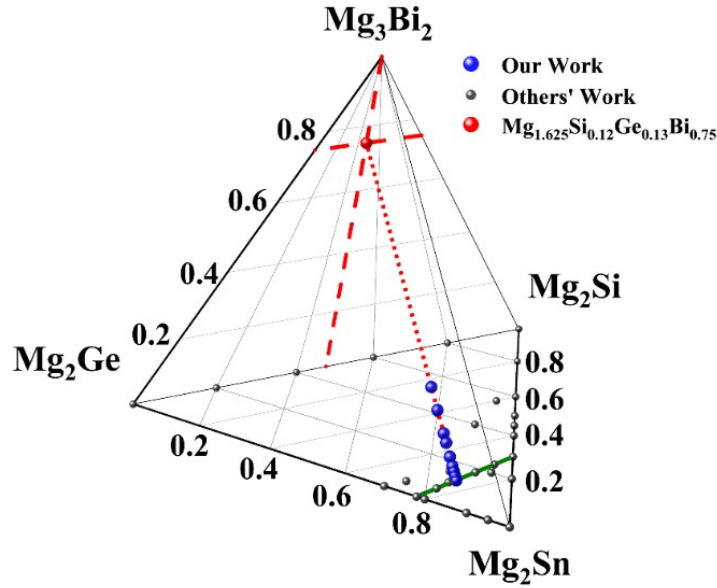

**Fig. S1.** Phase diagram of  $\text{Mg}_2\text{Si}$ - $\text{Mg}_2\text{Ge}$ - $\text{Mg}_2\text{Sn}$ - $\text{Mg}_3\text{Bi}_2$  quaternary system. The black sphere symbols represent the data from references<sup>3-10</sup>, while the blue sphere symbols represent the samples synthesized in this work.

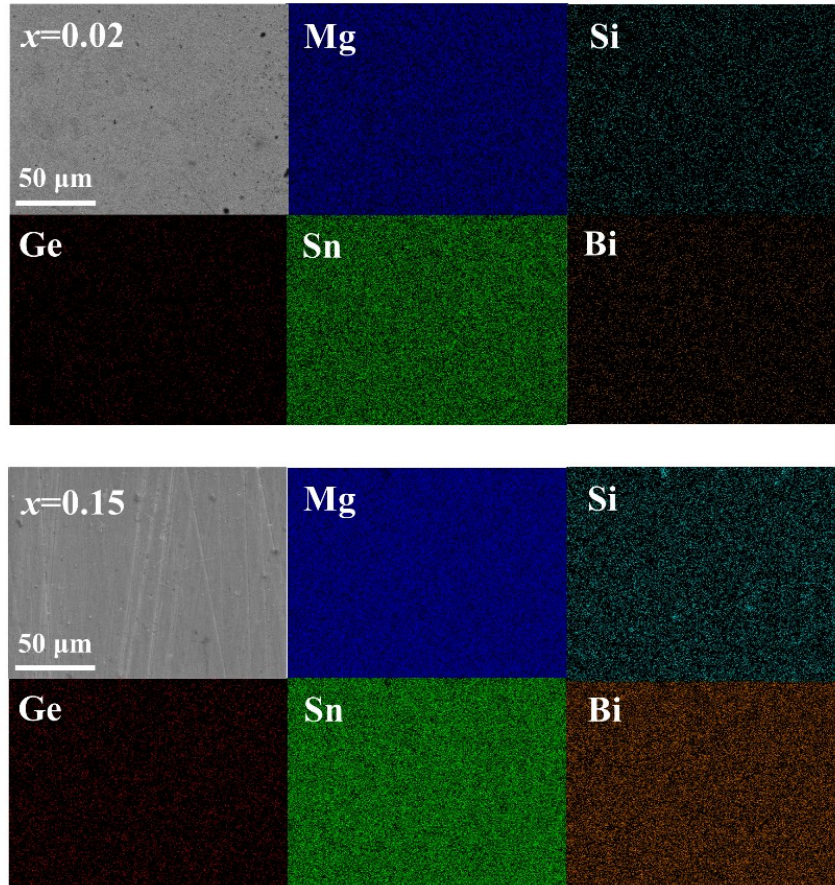

**Fig. S2.** Backscattered electron microscopy (BSE) images and corresponding elemental energy-dispersive X-ray spectroscopy (EDS) mapping of  $\text{Mg}_{2-\delta}\text{Si}_{0.12}\text{Ge}_{0.13}\text{Sn}_{0.75-x}\text{Bi}_x$  ( $x = 0.02, 0.15$ )

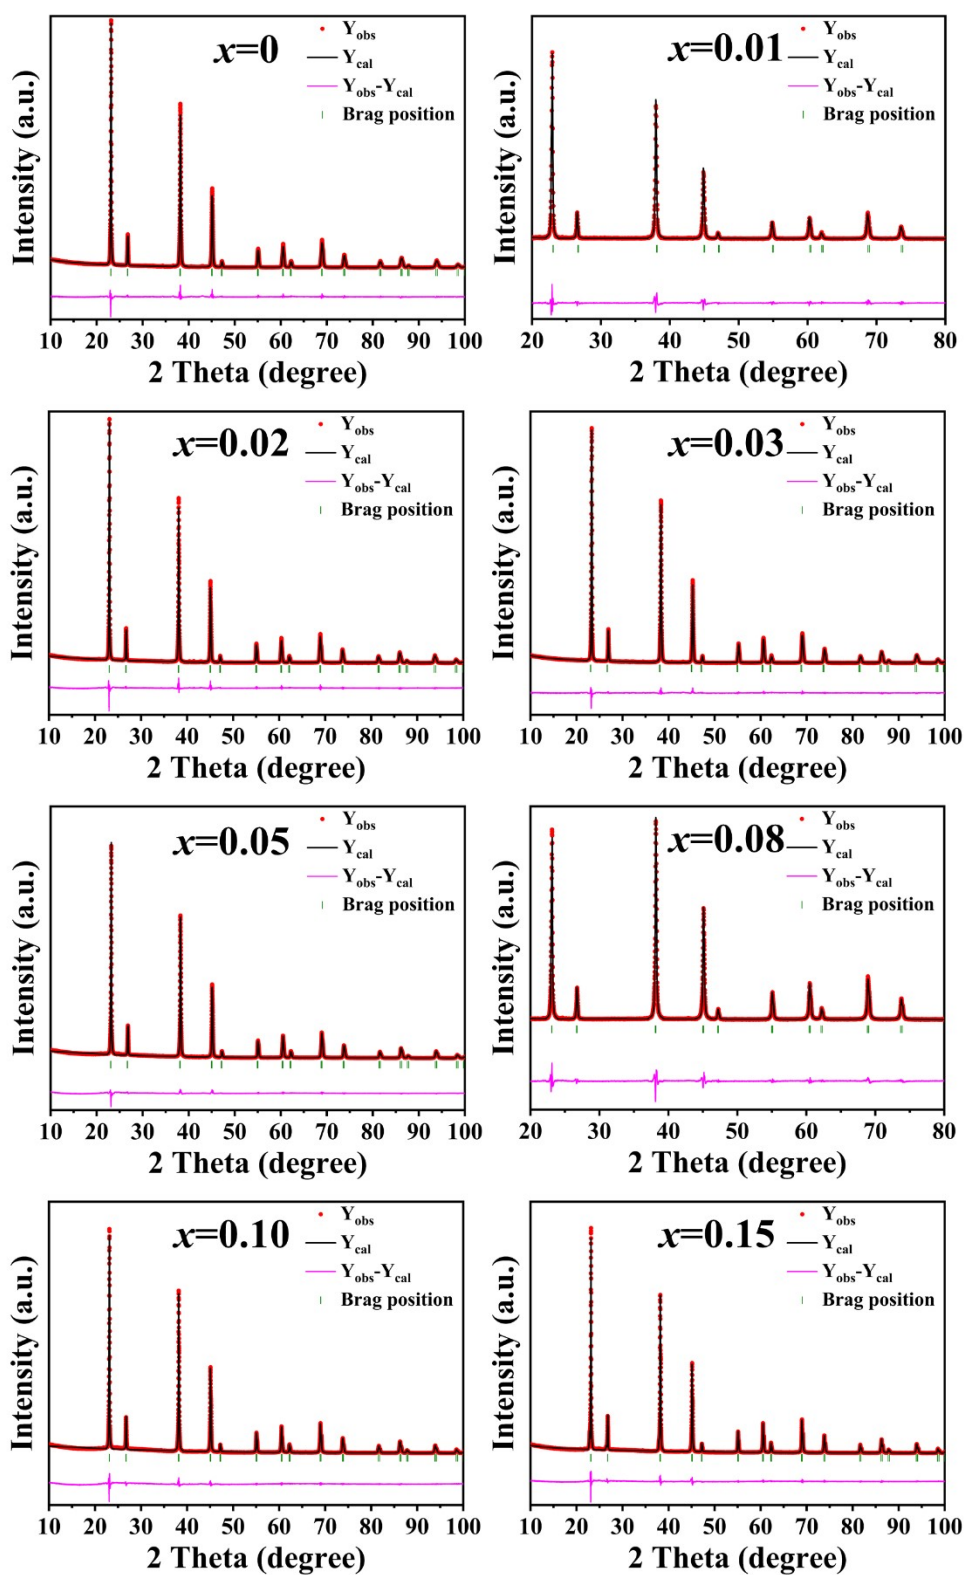

**Fig. S3.** Observed (red) and calculated (black) diffraction patterns and difference profiles (pink) for samples  $\text{Mg}_{2-\delta}\text{Si}_{0.12}\text{Ge}_{0.13}\text{Sn}_{0.75-x}\text{Bi}_x$  ( $x=0, 0.01, 0.02, 0.03, 0.05, 0.08, 0.10, 0.15$ ) at room temperature.

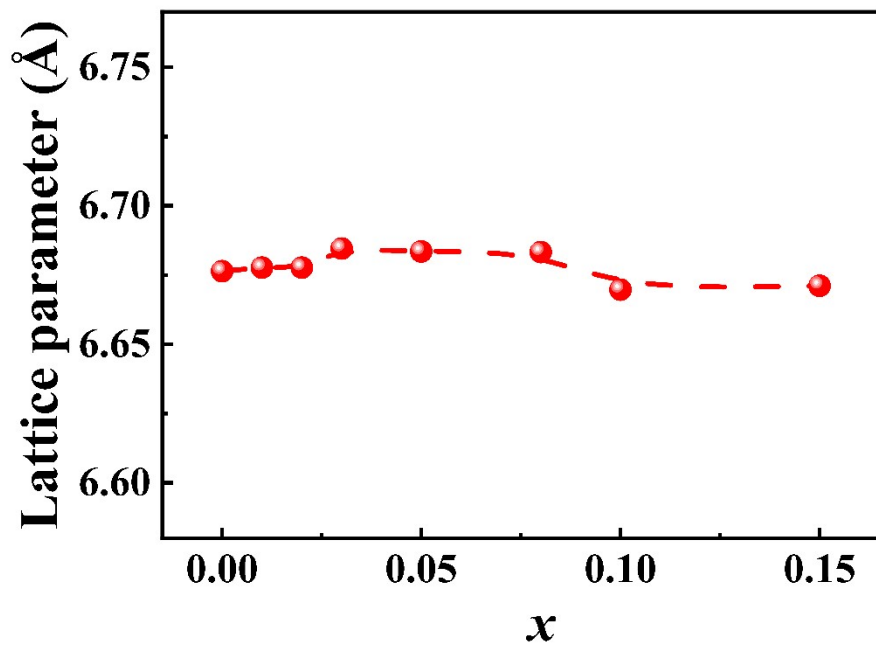

Fig. S4. Lattice parameter as a function of Bi content  $x$ .

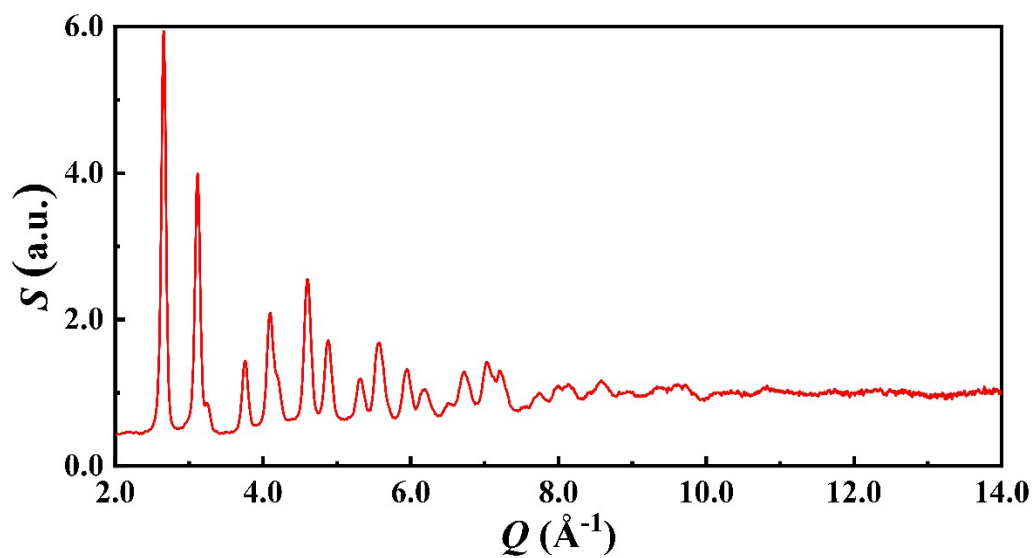

Fig. S5. Structure factor  $S$  as a function of  $Q$ .

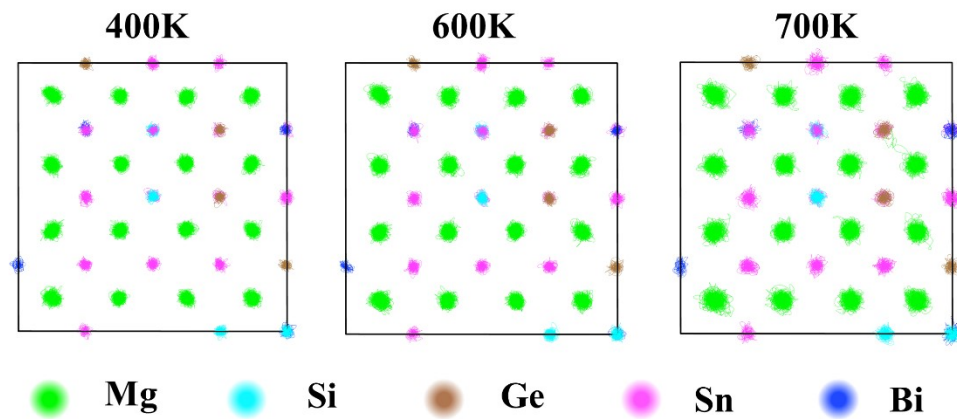

**Fig. S6.** Molecular dynamics simulations of the trajectory of Mg, Si, Ge, Sn, Bi at 400 K, 600 K, and 700 K

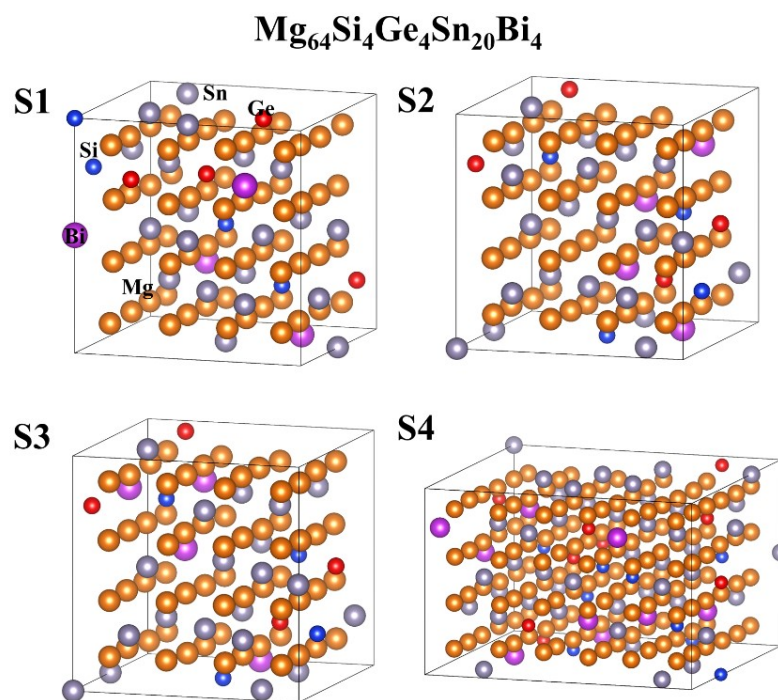

**Fig. S7.** Crystal structure of different supercells. (a) S1 ( $2 \times 2 \times 2$  supercell), (b) S2 ( $2 \times 2 \times 2$  supercell), (c) S3 ( $2 \times 2 \times 2$  supercell), and (d) S4 ( $3 \times 3 \times 2$  supercell).

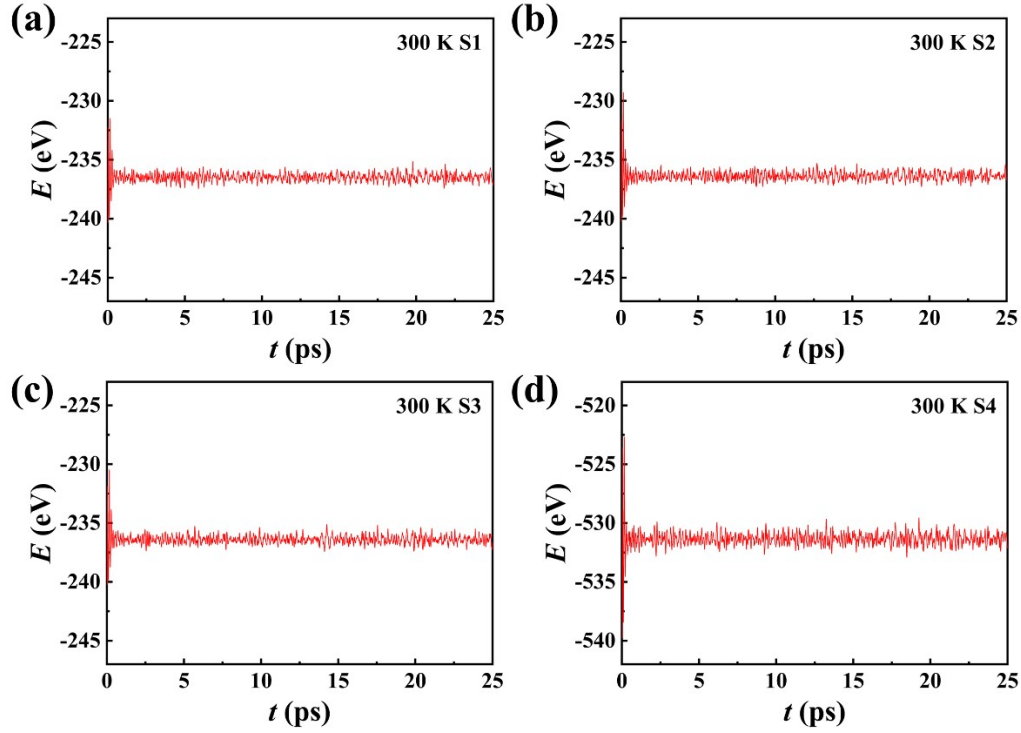

**Fig. S8.** Total energy  $E$  as a function of stimulation time  $t$  for different supercells. (a) S1 ( $2 \times 2 \times 2$  supercell), (b) S2 ( $2 \times 2 \times 2$  supercell), (c) S3 ( $2 \times 2 \times 2$  supercell), and (d) S4 ( $3 \times 3 \times 2$  supercell).

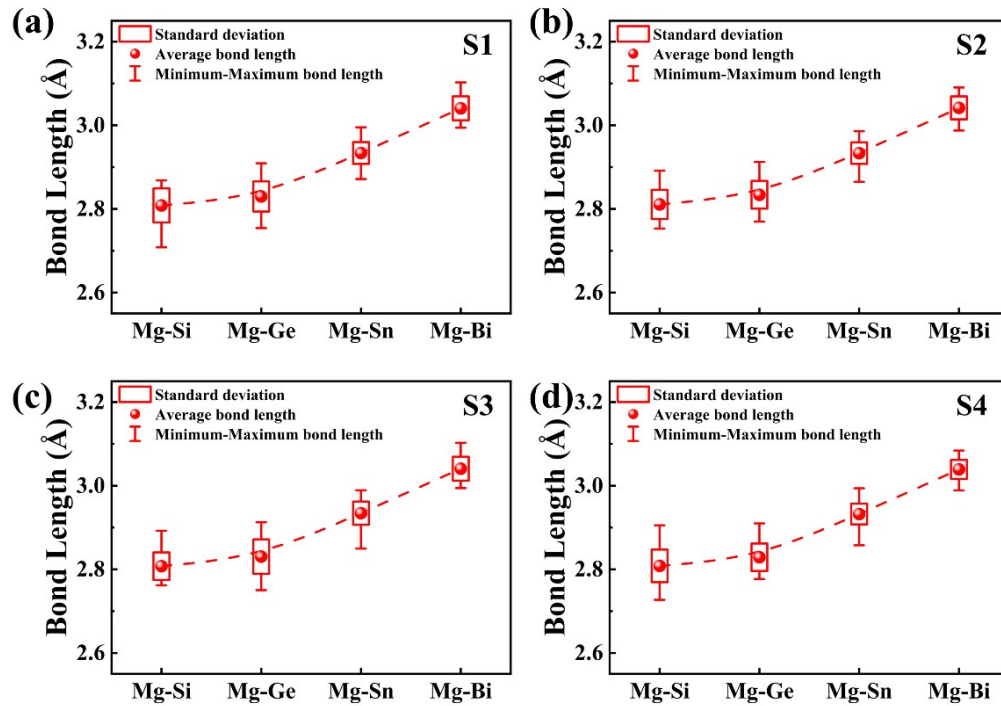

**Fig. S9.** Calculated bond length for different supercells. (a) S1 ( $2 \times 2 \times 2$  supercell), (b) S2 ( $2 \times 2 \times 2$  supercell), (c) S3 ( $2 \times 2 \times 2$  supercell), and (d) S4 ( $3 \times 3 \times 2$  supercell).



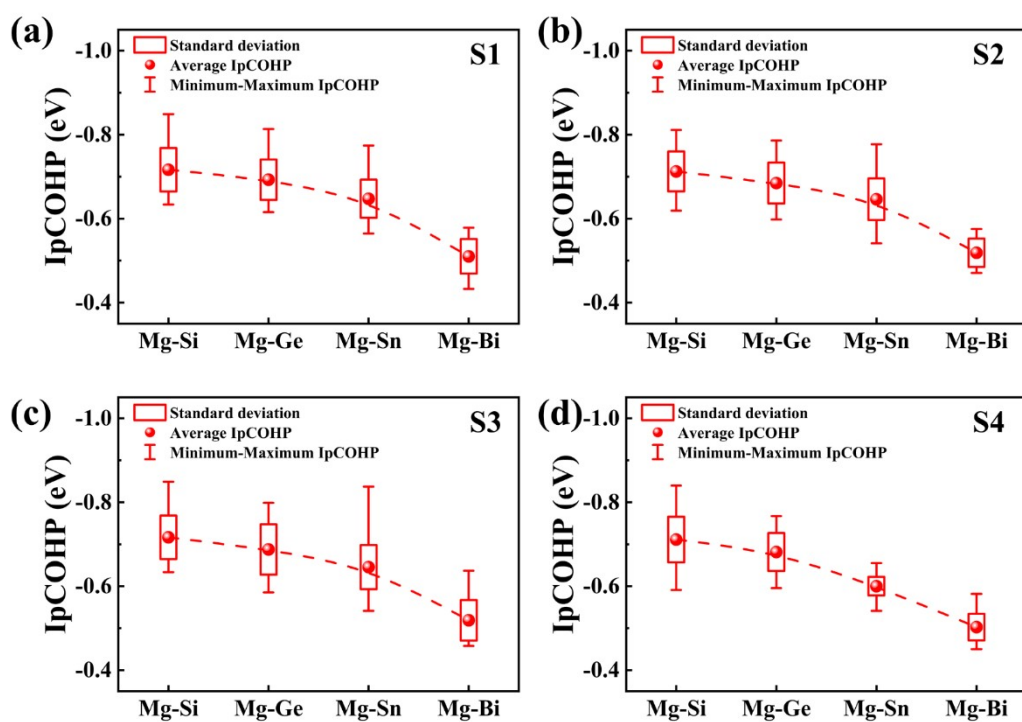

**Fig. S10.** Calculated  $I_p\text{COHP}$  for different supercells. (a) S1 ( $2\times 2\times 2$  supercell), (b) S2 ( $2\times 2\times 2$  supercell), (c) S3 ( $2\times 2\times 2$  supercell), and (d) S4 ( $3\times 3\times 2$  supercell).

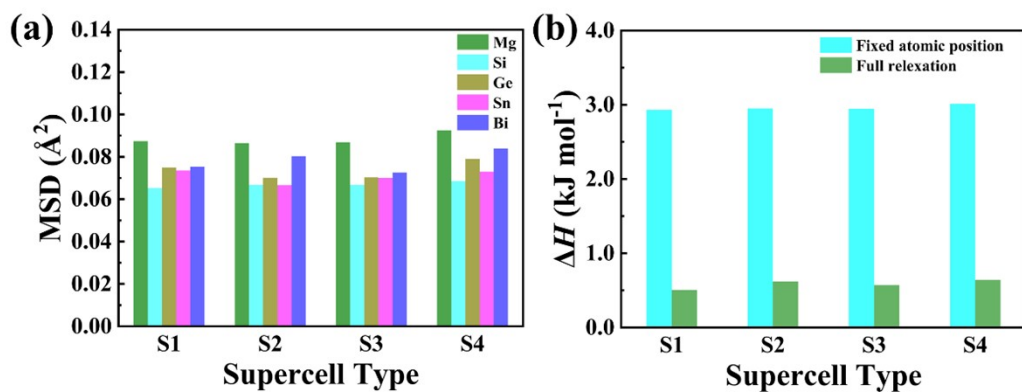

**Fig. S11.** Calculated (a) MSD at 300 K and (b) mixing enthalpy  $\Delta H$  for different supercells.

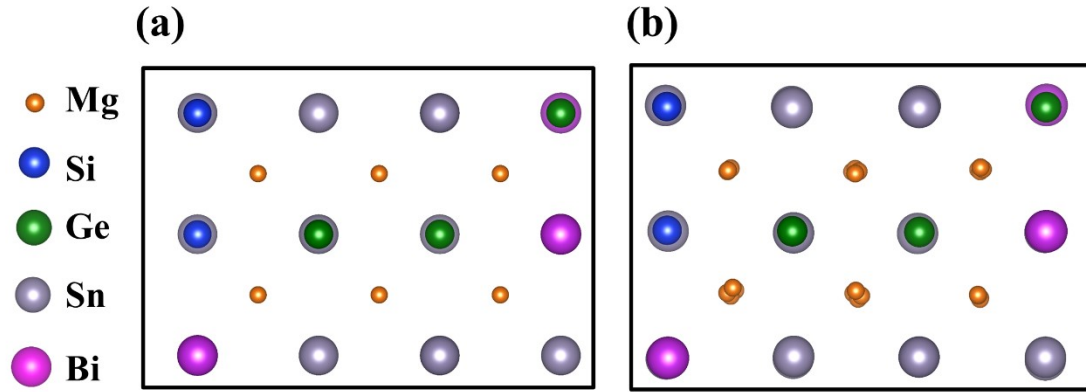

**Fig. S12.** The obtained crystal structures of  $\text{Mg}_2\text{Si}_4\text{Ge}_4\text{Sn}_{20}\text{Bi}_4$ : (a) volume relaxation with fixed atomic positions within the cubic lattice, (b) full relaxation with the cell volume, shape and atomic positions optimized.

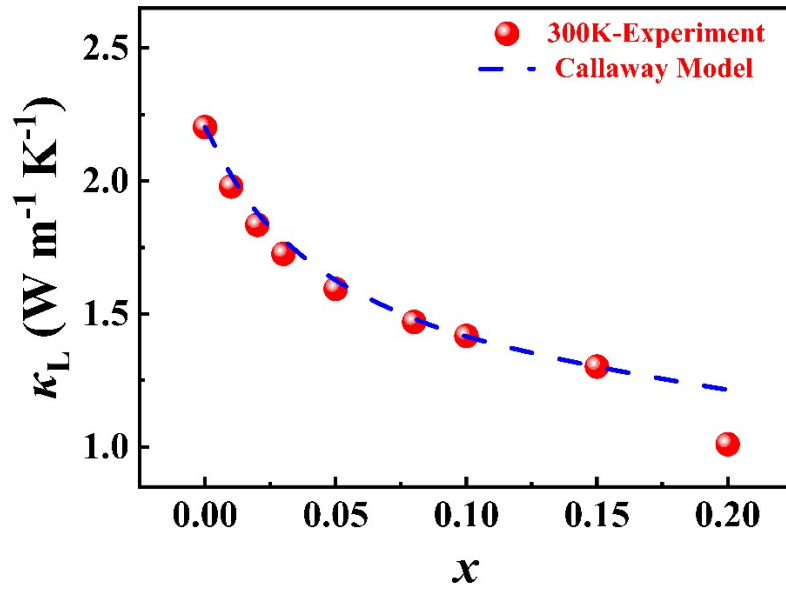

**Fig. S13.** Lattice thermal conductivity  $\kappa_L$  at 300 K as a function of Bi content  $x$ . The dashed line denotes the calculated  $\kappa_L$  by the Callaway model.

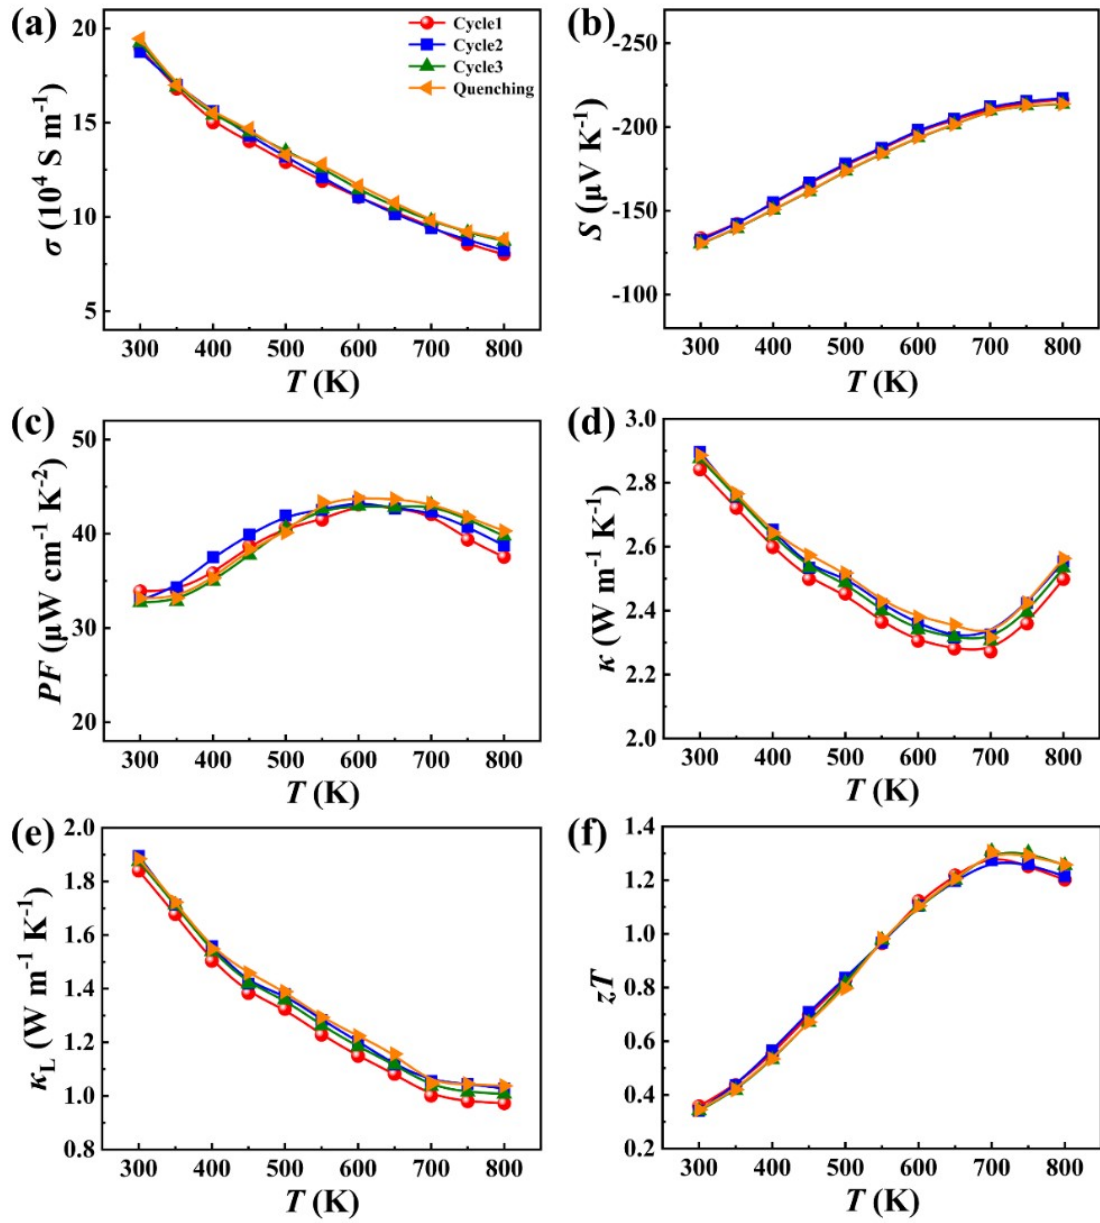

**Fig. S14.** Temperature dependence of (a) electrical conductivity  $\sigma$ , (b) Seebeck coefficient  $S$ , (c) power factor  $PF$ , (d) thermal conductivity  $\kappa$ , (e) lattice thermal conductivity  $\kappa_L$  and (d)  $zT$  of sample  $\text{Mg}_{2-\delta}\text{Si}_{0.12}\text{Ge}_{0.13}\text{Sn}_{0.73}\text{Bi}_{0.02}$  after three cycles and after quenching at 800 K.

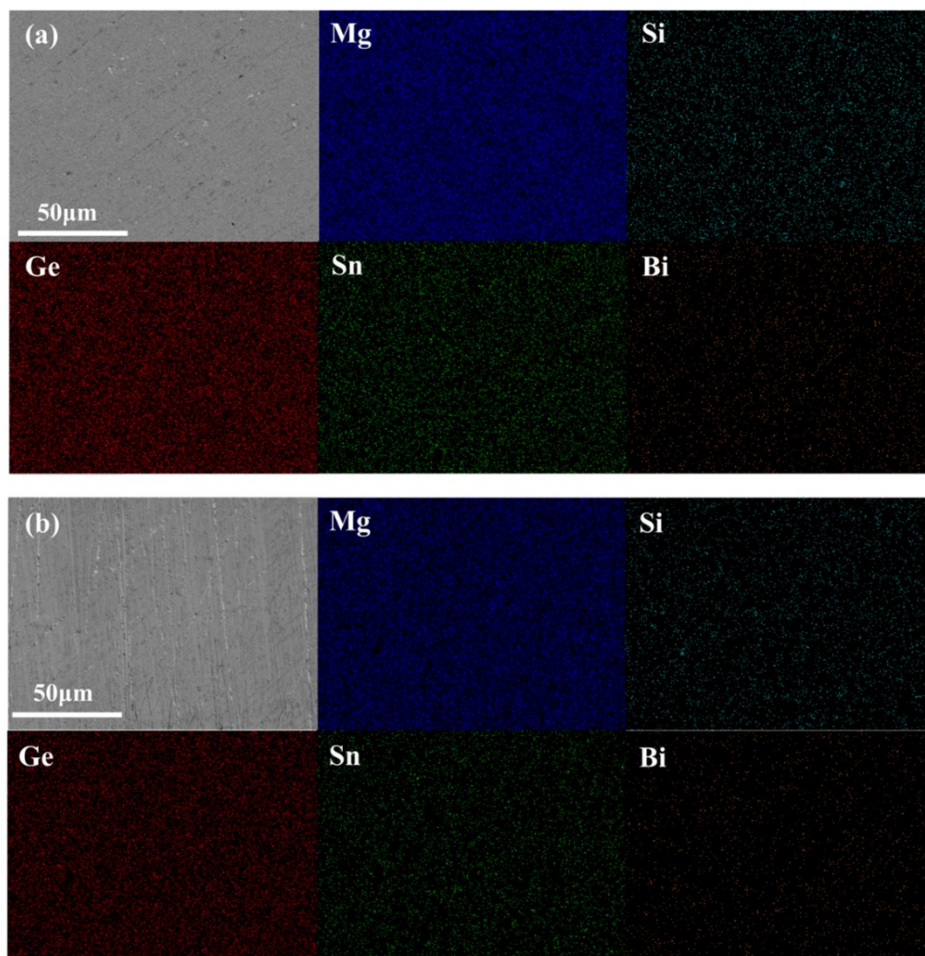

**Fig. S15.** Backscattered electron microscopy (BSE) images and corresponding elemental energy-dispersive X-ray spectroscopy (EDS) mapping of  $\text{Mg}_2\text{-}\delta\text{Si}_{0.12}\text{Ge}_{0.13}\text{Sn}_{0.73}\text{Bi}_{0.02}$ . (a) after three cycles; (b) after quenching.

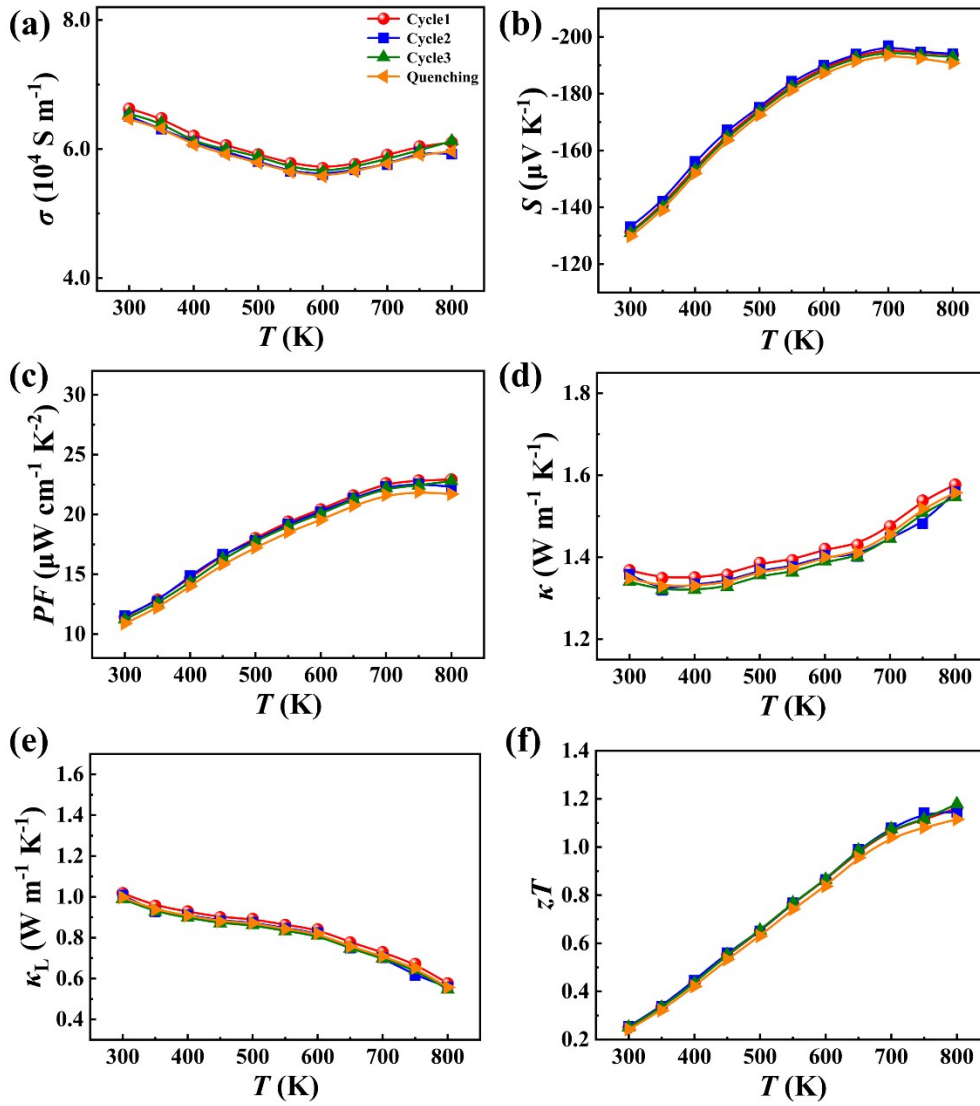

**Fig. S16.** Temperature dependence of (a) electrical conductivity  $\sigma$ , (b) Seebeck coefficient  $S$ , (c) power factor  $PF$ , (d) thermal conductivity  $\kappa$ , (e) lattice thermal conductivity  $\kappa_L$  and (d)  $zT$  of sample  $\text{Mg}_{2-\delta}\text{Si}_{0.12}\text{Ge}_{0.13}\text{Sn}_{0.55}\text{Bi}_{0.20}$  after three cycles and after quenching at 800 K.

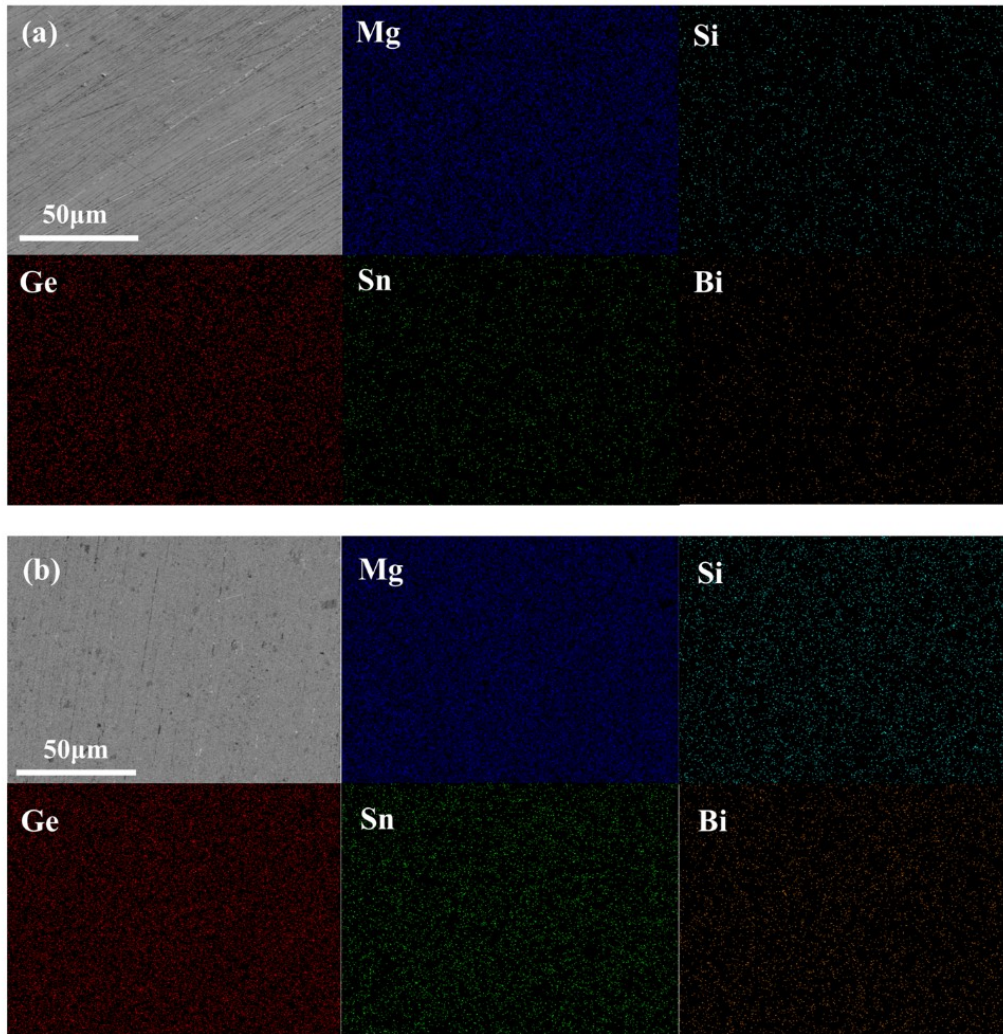

**Fig. S17.** Backscattered electron microscopy (BSE) images and corresponding elemental energy-dispersive X-ray spectroscopy (EDS) mapping of  $\text{Mg}_{2-\delta}\text{Si}_{0.12}\text{Ge}_{0.13}\text{Sn}_{0.55}\text{Bi}_{0.20}$  (a) after three cycles; (b) after quenching.

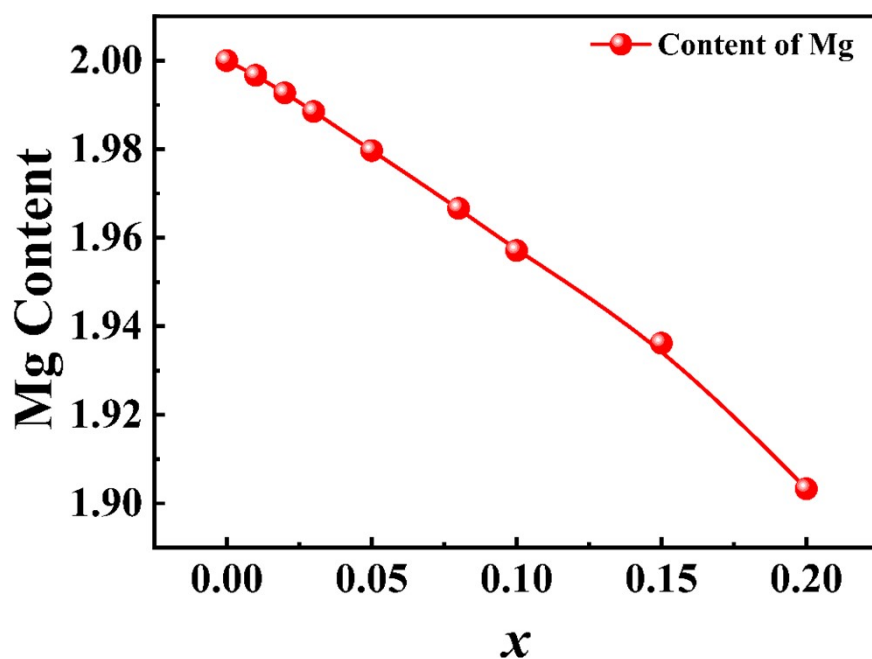

Fig. S18. Calculated Mg content as a function of Bi content  $x$

Table S1. Atomic radius, electronegativity, and the most likely valence state of Mg, Si, Ge, Sn and Bi in  $\text{Mg}_{2-\delta}\text{Si}_{0.12}\text{Ge}_{0.132}\text{Sn}_{0.748-x}\text{Bi}_x$ .

| Atom | Atomic radius (Å) | Electronegativity | Valence state |
|------|-------------------|-------------------|---------------|
| Mg   | 1.50              | 1.31              | +2            |
| Si   | 1.10              | 1.90              | -4            |
| Ge   | 1.25              | 2.01              | -4            |
| Sn   | 1.45              | 1.96              | -4            |
| Bi   | 1.60              | 2.02              | -3            |

Table S2. Rietveld refined results of samples  $\text{Mg}_{2-\delta}\text{Si}_{0.12}\text{Ge}_{0.13}\text{Sn}_{0.75-x}\text{Bi}_x$

| <b>Composition</b> | <b>Atom</b> | <b>x</b> | <b>y</b> | <b>z</b> | <b>Occ.</b> | $U_{\text{iso}}$ | <b>Site</b> | <b>Sym.</b> |
|--------------------|-------------|----------|----------|----------|-------------|------------------|-------------|-------------|
| <b>x=0</b>         | Mg          | 0.25     | 0.75     | 0.75     | 0.994       | 0.014            | 8c          | -43m        |
|                    | Si          | 0        | 0        | 0        | 0.120       | 0.006            | 4a          | m-3m        |
|                    | Ge          | 0        | 0        | 0        | 0.130       | 0.006            | 4a          | m-3m        |
|                    | Sn          | 0        | 0        | 0        | 0.750       | 0.006            | 4a          | m-3m        |
| <b>x=0.01</b>      | Mg          | 0.25     | 0.75     | 0.75     | 1.000       | 0.011            | 8c          | -43m        |
|                    | Si          | 0        | 0        | 0        | 0.120       | 0.002            | 4a          | m-3m        |
|                    | Ge          | 0        | 0        | 0        | 0.130       | 0.002            | 4a          | m-3m        |
|                    | Sn          | 0        | 0        | 0        | 0.740       | 0.002            | 4a          | m-3m        |
|                    | Bi          | 0        | 0        | 0        | 0.010       | 0.002            | 4a          | m-3m        |
| <b>x=0.02</b>      | Mg          | 0.25     | 0.75     | 0.75     | 0.981       | 0.014            | 8c          | -43m        |
|                    | Si          | 0        | 0        | 0        | 0.120       | 0.006            | 4a          | m-3m        |
|                    | Ge          | 0        | 0        | 0        | 0.130       | 0.006            | 4a          | m-3m        |
|                    | Sn          | 0        | 0        | 0        | 0.730       | 0.006            | 4a          | m-3m        |
|                    | Bi          | 0        | 0        | 0        | 0.020       | 0.006            | 4a          | m-3m        |
| <b>x=0.03</b>      | Mg          | 0.25     | 0.75     | 0.75     | 0.983       | 0.014            | 8c          | -43m        |
|                    | Si          | 0        | 0        | 0        | 0.120       | 0.005            | 4a          | m-3m        |
|                    | Ge          | 0        | 0        | 0        | 0.130       | 0.005            | 4a          | m-3m        |
|                    | Sn          | 0        | 0        | 0        | 0.720       | 0.005            | 4a          | m-3m        |
|                    | Bi          | 0        | 0        | 0        | 0.030       | 0.005            | 4a          | m-3m        |
| <b>x=0.05</b>      | Mg          | 0.25     | 0.75     | 0.75     | 0.973       | 0.014            | 8c          | -43m        |
|                    | Si          | 0        | 0        | 0        | 0.120       | 0.005            | 4a          | m-3m        |





---

|    |   |   |   |       |       |    |      |
|----|---|---|---|-------|-------|----|------|
| Bi | 0 | 0 | 0 | 0.200 | 0.009 | 4a | m-3m |
|----|---|---|---|-------|-------|----|------|

---

**Table S3.** Quality factor of Rietveld refinement.

| Composition   | $R_p$ | $wR_p$ | $R_{obs}$ | $wR_{obs}$ | $R_{all}$ | $wR_{all}$ |
|---------------|-------|--------|-----------|------------|-----------|------------|
| <b>x=0</b>    | 4.63% | 6.30%  | 1.51%     | 2.40%      | 1.51%     | 2.40%      |
| <b>x=0.01</b> | 5.04% | 6.93%  | 1.52%     | 2.01%      | 1.52%     | 2.01%      |
| <b>x=0.02</b> | 5.09% | 6.58%  | 1.49%     | 2.24%      | 1.49%     | 2.24%      |
| <b>x=0.03</b> | 3.64% | 5.17%  | 1.20%     | 1.87%      | 1.20%     | 1.87%      |
| <b>x=0.05</b> | 5.10% | 6.45%  | 1.45%     | 2.23%      | 1.45%     | 2.23%      |
| <b>x=0.08</b> | 4.16% | 5.98%  | 1.19%     | 1.82%      | 1.19%     | 1.82%      |
| <b>x=0.10</b> | 6.97% | 8.78%  | 1.29%     | 2.53%      | 1.29%     | 2.53%      |
| <b>x=0.15</b> | 6.13% | 7.75%  | 1.11%     | 2.15%      | 1.11%     | 2.15%      |
| <b>x=0.20</b> | 5.26% | 7.26%  | 1.33%     | 2.24%      | 1.33%     | 2.24%      |

**Table S4.** ADP and error of samples  $Mg_{2-\delta}Si_{0.12}Ge_{0.13}Sn_{0.75-x}Bi_x$ .

| Composition   | Mg $U_{iso}$ ( $\text{\AA}^2$ ) | Error ( $\text{\AA}^2$ ) | X $U_{iso}$ ( $\text{\AA}^2$ ) | Error ( $\text{\AA}^2$ ) |
|---------------|---------------------------------|--------------------------|--------------------------------|--------------------------|
| <b>x=0</b>    | 0.0144                          | $4 \times 10^{-4}$       | 0.006                          | $1.2 \times 10^{-4}$     |
| <b>x=0.01</b> | 0.015                           | $4 \times 10^{-4}$       | 0.007                          | $1.2 \times 10^{-4}$     |
| <b>x=0.02</b> | 0.0138                          | $4 \times 10^{-4}$       | 0.00634                        | $1.3 \times 10^{-4}$     |

|                            |        |                    |         |                      |
|----------------------------|--------|--------------------|---------|----------------------|
| <b><math>x=0.03</math></b> | 0.014  | $3 \times 10^{-4}$ | 0.00541 | $9 \times 10^{-5}$   |
| <b><math>x=0.05</math></b> | 0.0138 | $4 \times 10^{-4}$ | 0.00526 | $1.4 \times 10^{-4}$ |
| <b><math>x=0.08</math></b> | 0.016  | $2 \times 10^{-4}$ | 0.0073  | $1 \times 10^{-4}$   |
| <b><math>x=0.10</math></b> | 0.0202 | $9 \times 10^{-4}$ | 0.0137  | $8 \times 10^{-4}$   |
| <b><math>x=0.15</math></b> | 0.0236 | $7 \times 10^{-4}$ | 0.0168  | $6 \times 10^{-4}$   |

**Table S5.** PDF fits results of samples  $\text{Mg}_{2-\delta}\text{Si}_{0.12}\text{Ge}_{0.13}\text{Sn}_{0.65}\text{Bi}_{0.10}$ .

| <b>Structure</b>                     | <b>Atom</b> | <b>x</b> | <b>y</b> | <b>z</b> | <b>Occ.</b> | $U_{\text{iso}}$ | <b>Site</b> | <b>Sym.</b> |
|--------------------------------------|-------------|----------|----------|----------|-------------|------------------|-------------|-------------|
| <b>Broken<br/>symmetry<br/>model</b> | Mg1         | 0.234    | 0.766    | 0.766    | 0.960       | 3.520            | 1a          | 1           |
|                                      | Mg2         | 0.765    | 0.234    | 0.766    | 0.960       | 3.520            | 1a          | 1           |
|                                      | Mg3         | 0.765    | 0.766    | 0.234    | 0.960       | 3.520            | 1a          | 1           |
|                                      | Mg4         | 0.234    | 0.234    | 0.234    | 0.960       | 3.520            | 1a          | 1           |
|                                      | Mg5         | 0.765    | 0.234    | 0.234    | 0.960       | 3.520            | 1a          | 1           |
|                                      | Mg6         | 0.234    | 0.766    | 0.234    | 0.960       | 3.520            | 1a          | 1           |
|                                      | Mg7         | 0.765    | 0.766    | 0.766    | 0.960       | 3.520            | 1a          | 1           |
|                                      | Mg8         | 0.234    | 0.234    | 0.766    | 0.960       | 3.520            | 1a          | 1           |
|                                      | Si          | 0        | 0        | 0        | 0.120       | 2.180            | 4a          | m-3m        |
|                                      | Ge          | 0        | 0        | 0        | 0.130       | 2.180            | 4a          | m-3m        |
|                                      | Sn          | 0        | 0        | 0        | 0.650       | 2.180            | 4a          | m-3m        |
|                                      | Bi          | 0        | 0        | 0        | 0.100       | 2.180            | 4a          | m-3m        |
|                                      | Mg          | 0.25     | 0.75     | 0.75     | 0.961       | 0.045            | 8c          | -43m        |

|    |   |   |   |       |       |    |      |
|----|---|---|---|-------|-------|----|------|
| Si | 0 | 0 | 0 | 0.120 | 0.021 | 4a | m-3m |
| Ge | 0 | 0 | 0 | 0.130 | 0.021 | 4a | m-3m |
| Sn | 0 | 0 | 0 | 0.650 | 0.021 | 4a | m-3m |
| Bi | 0 | 0 | 0 | 0.100 | 0.021 | 4a | m-3m |

**Table S6.** The atomic radius, ionic radius, and orbital energy of Mg, Si, Ge, Sn and Bi.

| Elements  | Atomic radius (Å) | Ionic radius (Å) | Orbital energy       |
|-----------|-------------------|------------------|----------------------|
| <b>Mg</b> | 1.50              | 0.86             | -7.65 eV (s orbital) |
| <b>Si</b> | 1.10              | 0.54             | -7.78 eV (p orbital) |
| <b>Ge</b> | 1.25              | 0.67             | -7.54 eV (p orbital) |
| <b>Sn</b> | 1.45              | 0.83             | -7.01 eV (p orbital) |
| <b>Bi</b> | 1.60              | 1.17             | -8.15 eV (p orbital) |

## Reference

1. R. Simon, *J. Appl. Phys.*, 1962, **33**, 1830-1841.
2. J. Lei, H. Wuliji, K. Zhao, T.-R. Wei, Q. Xu, P. Li, P. Qiu and X. Shi, *J. Mater. Chem. A*, 2021, **9**, 25944-25953.
3. J. de Boor, U. Saparamadu, J. Mao, K. Dahal, E. Müller and Z. Ren, *Acta Mater.*, 2016, **120**, 273-280.
4. A. U. Khan, N. V. Vlachos, E. Hatzikraniotis, G. S. Polymeris, C. B. Lioutas, E. C. Stefanaki, K. M. Paraskevopoulos, I. Giapintzakis and T. Kyratsi, *Acta Mater.*, 2014, **77**, 43-53.
5. H. Ihou-Mouko, C. Mercier, J. Tobola, G. Pont and H. Scherrer, *J. Alloys Compd.*, 2011, **509**, 6503-6508.
6. R. J. LaBetz, D. R. Mason and D. F. O'Kane, *J. Electrochem. Soc.*, 1963, **110**, 127.
7. W. Liu, X. Tan, K. Yin, H. Liu, X. Tang, J. Shi, Q. Zhang and C. Uher, *Phys. Rev. Lett.*, 2012, **108**, 166601.
8. W. Liu, H. S. Kim, S. Chen, Q. Jie, B. Lv, M. Yao, Z. Ren, C. P. Opeil, S. Wilson, C.-W. Chu and Z. Ren, *Proc. Natl. Acad. Sci. USA*, 2015, **112**, 3269-3274.
9. A. U. Khan, N. Vlachos and T. Kyratsi, *Scripta Mater.*, 2013, **69**, 606-609.

10. W. Liu, J. Zhou, Q. Jie, Y. Li, H. S. Kim, J. Bao, G. Chen and Z. Ren, *Energy Environ. Sci.*, 2016, **9**, 530-539.
